# Supplementary material for: How Insertion of a Single Tryptophan in the N-Terminus of a Cecropin A-Melittin Hybrid Peptide Changes Its Antimicrobial and Biophysical Profile
Source: Membranes (Basel). 2021 Jan 12;11(1):48. doi: 10.3390/membranes11010048 (PMC7826622; doi:10.3390/membranes11010048)
Supplement: Supplementary file 1 [file membranes-11-00048-s001.pdf]

# Supplementary Material: How insertion of a single tryptophan in the N-terminus of a cecropin A-melittin hybrid peptide changes its antimicrobial and biophysical profile

Ana Rita Ferreira, Cátia Teixeira, Carla F. Sousa, Lucinda J. Bessa, Paula Gomes, and Paula Gameiro

**Table S1.** Properties of peptides BP100 and W-BP100.

| Peptide <sup>a</sup>                       | BP100       | W-BP100      |
|--------------------------------------------|-------------|--------------|
| Sequence <sup>b</sup>                      | KKLFKKILKYL | WKKLFKKILKYL |
| No. amino acids                            | 11          | 12           |
| MW calc. (DA) <sup>c</sup>                 | 1419.97     | 1606.05      |
| MW found (DA) <sup>c</sup>                 | 1419.80     | 1606.87      |
| Retention time (min)                       | 11.2        | 12.4         |
| Purity (%)                                 | 97.6        | 98.0         |
| Net charge <sup>d</sup>                    | + 6         | + 6          |
| Hydrophobicity (H) <sup>e</sup>            | 0.427       | 0.579        |
| Hydrophobic moment ( $\mu$ H) <sup>e</sup> | 0.847       | 0.964        |

<sup>a</sup> All peptides were produced as C-terminal amides.

<sup>b</sup> Amino acids residues represented by the single letter code as defined by the IUPAC-IUBMB guidelines on nomenclature and symbolism for amino acids and peptides.

<sup>c</sup> Calculated and experimentally found molecular weight (MW) of peptides.

<sup>d</sup> Total charge from lysine residues and the N-terminal amine at pH 7.4.

<sup>e</sup> Calculated in the HELIQUEST web server [1].

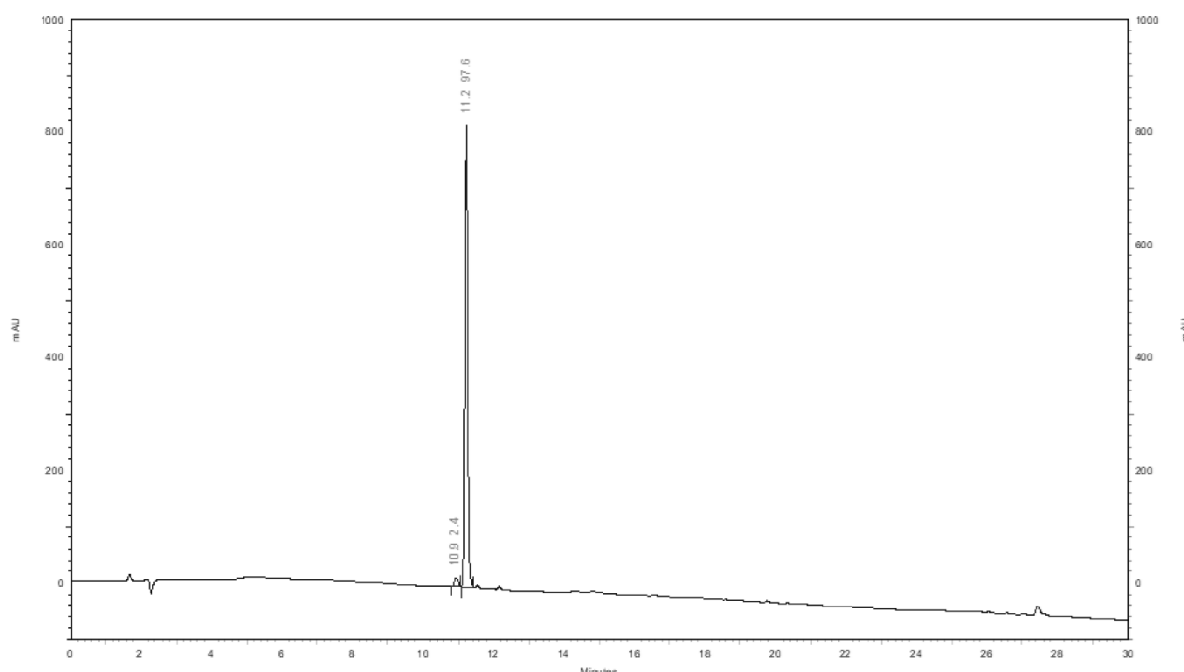

**Figure S1.** Chromatogram of peptide BP100 acquired by analytical HPLC.

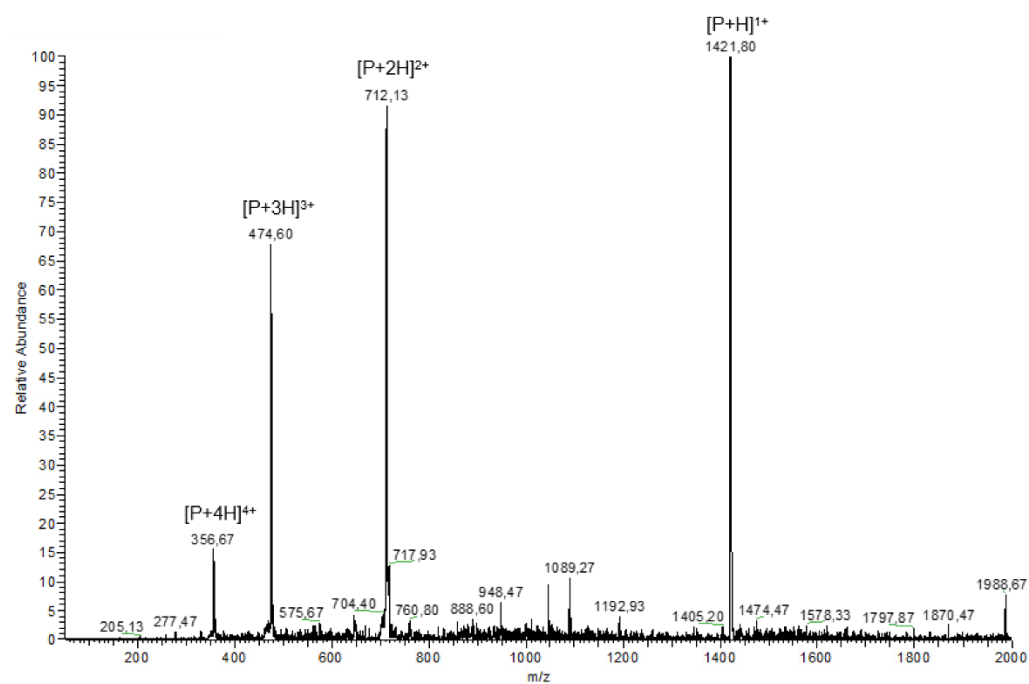

Figure S2. ESI-IT MS spectrum of peptide BP100.

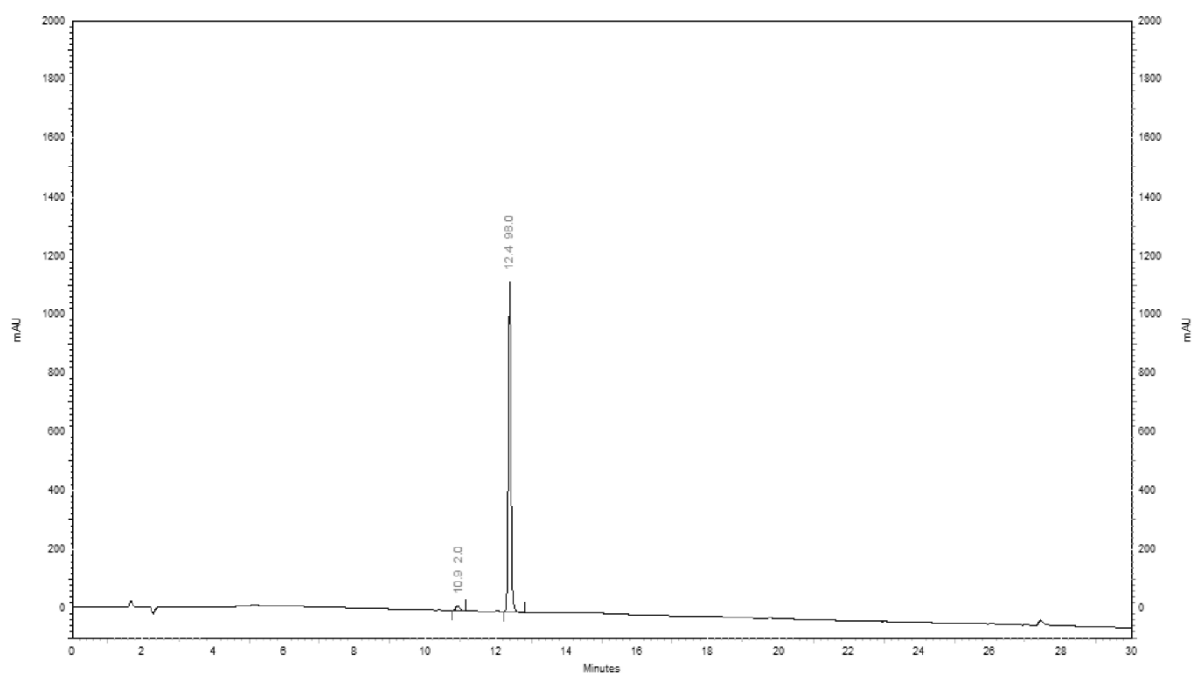

Figure S3. Chromatogram of peptide W-BP100 acquired by analytical HPLC.

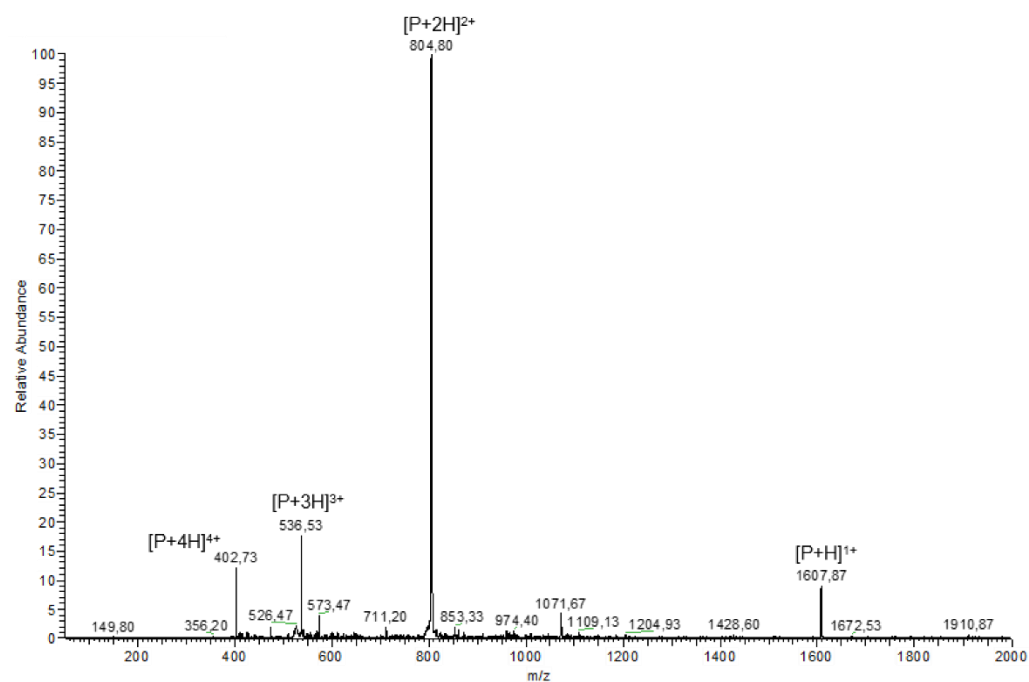

Figure S4. ESI-IT MS spectrum of peptide W-BP100.

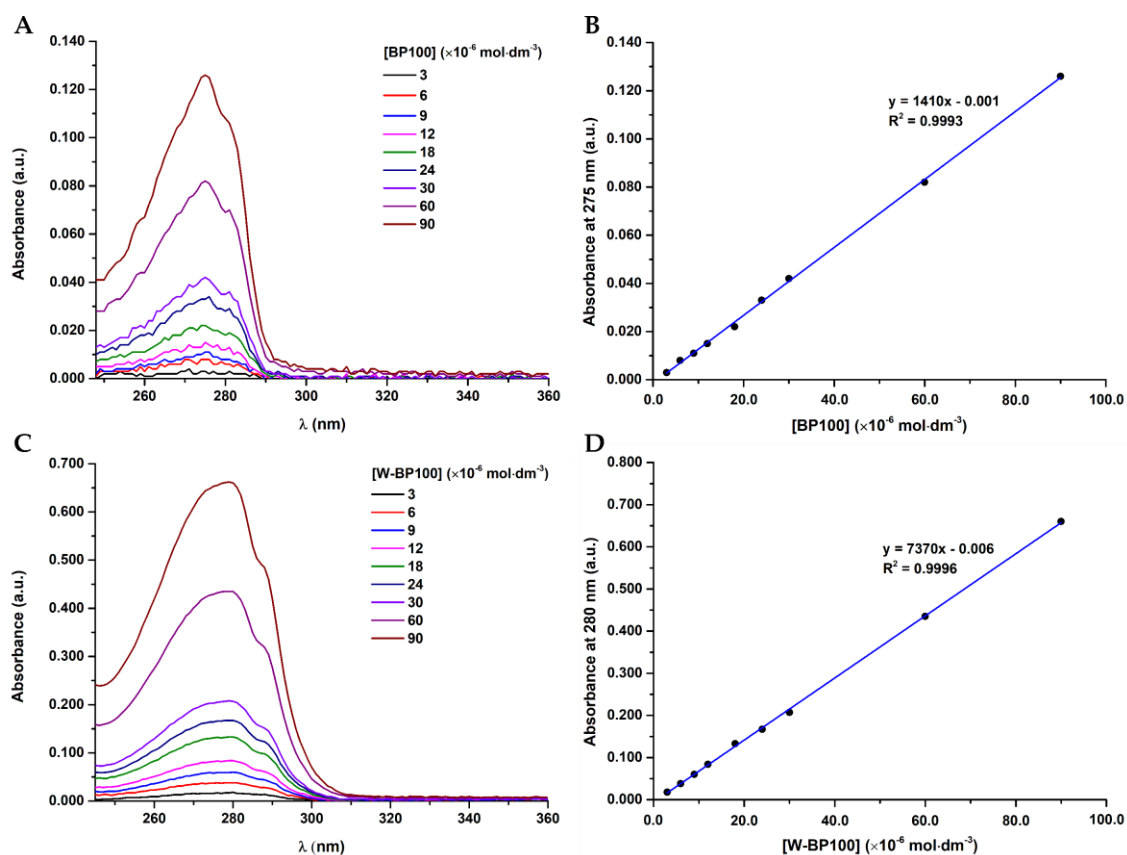

Figure S5. Absorption spectra of peptides BP100 and W-BP100. Representative absorption spectra of increasing concentrations of (A) BP100 and (C) W-BP100 in aqueous solution (10 mmol dm $^{-3}$  HEPES, 150 mmol dm $^{-3}$  NaCl, pH 7.4), at  $25 \pm 0.1$  °C. Lambert-Beer law of (B) BP100 ( $\lambda = 275$  nm) and (D) W-BP100 ( $\lambda = 280$  nm).

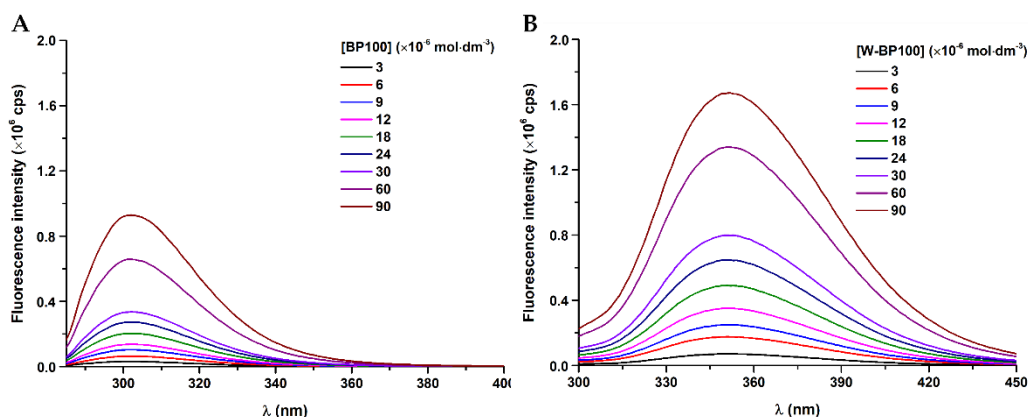

**Figure S6.** Fluorescence emission spectra of peptides BP100 and W-BP100. Representative fluorescence emission spectra of increasing concentrations of (A) BP100 and (B) W-BP100 in HEPES buffer ( $10 \text{ mmol dm}^{-3}$  HEPES,  $150 \text{ mmol dm}^{-3}$  NaCl, pH 7.4), at  $25 \pm 0.1^\circ\text{C}$ .

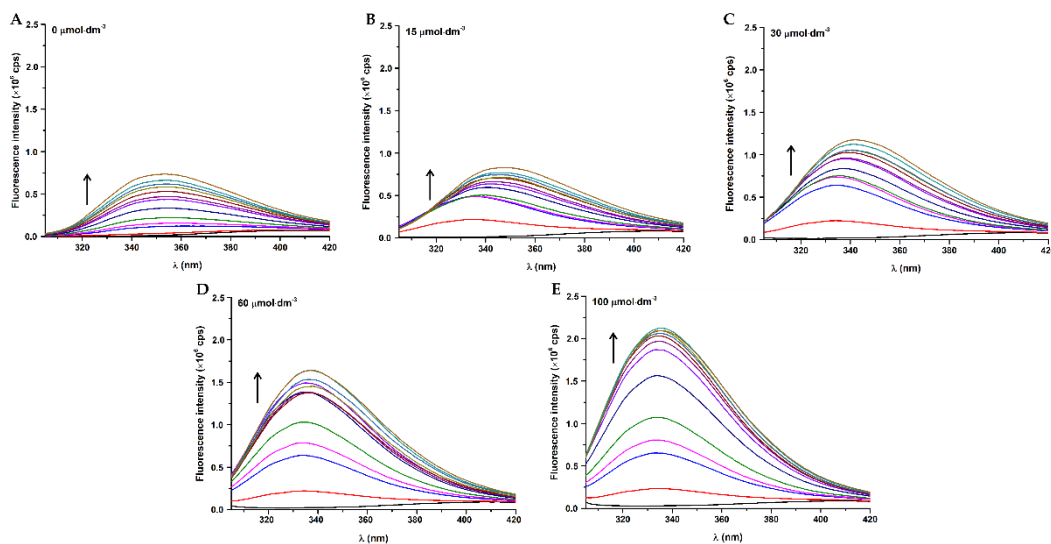

**Figure S7.** Fluorescence emission spectra of titration of anionic LUV with W-BP100 to evaluate membrane saturation. Representative fluorescence spectra of titration of 0, 15, 30, 60 and  $100 \text{ μmol dm}^{-3}$  POPC:POPG (1:1) LUV, in the presence of  $100 \text{ mmol dm}^{-3}$  acrylamide, with increasing concentrations of W-BP100, at  $25 \pm 0.1^\circ\text{C}$ . Arrows represent the increase of W-BP100 concentration.

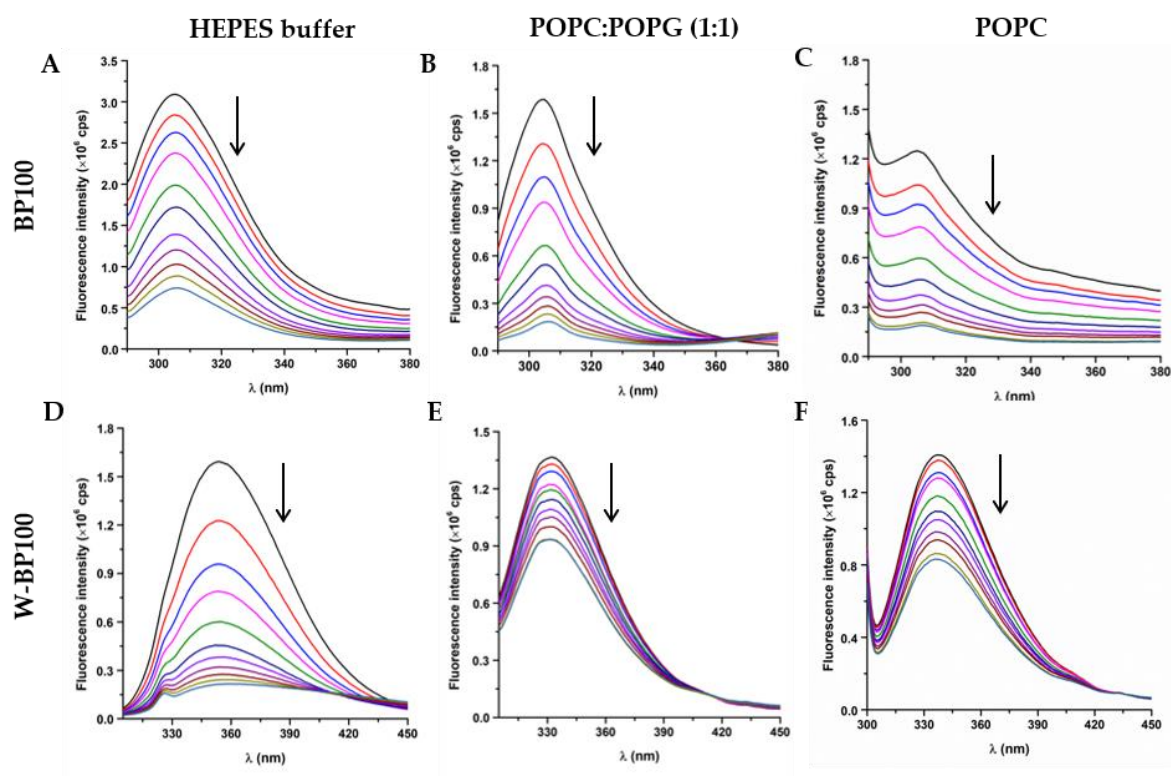

**Figure S8.** Fluorescence emission spectra of peptide's quenching by acrylamide. Representative fluorescence spectra of  $9 \mu\text{mol dm}^{-3}$  BP100 and W-BP100 in the presence of increasing concentrations of acrylamide in (A) HEPES buffer, (B) POPC:POPG (1:1) and (C) POPC LUV, at  $25 \pm 0.1^\circ\text{C}$ . Arrows represent the increase of acrylamide concentration.

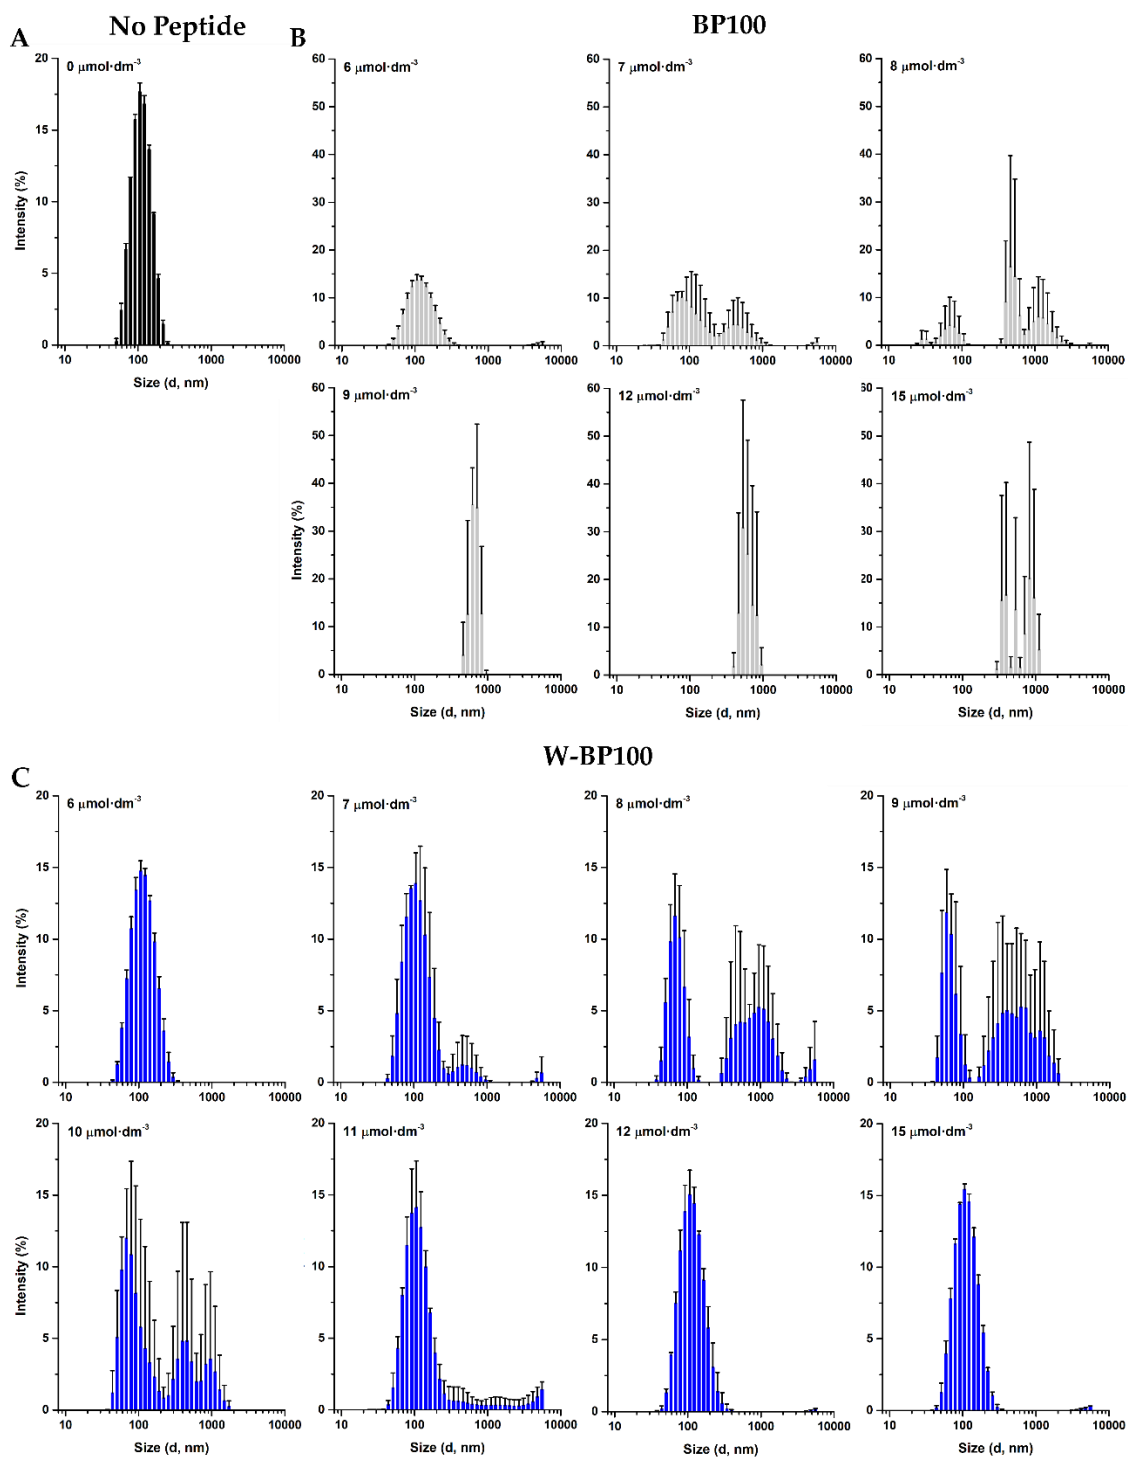

**Figure S9.** Intensity-weighted size distribution of anionic LUV in the presence of peptides. Intensity-weighted size distribution of  $100 \mu\text{mol dm}^{-3}$  POPC:POPG (1:1) LUV in (A) absence and (B) presence of 0–15  $\mu\text{mol dm}^{-3}$  BP100 and (C) W-BP100.  $d$  stands for vesicle diameter. Data are the mean  $\pm$  SD of at least three independent experiments.

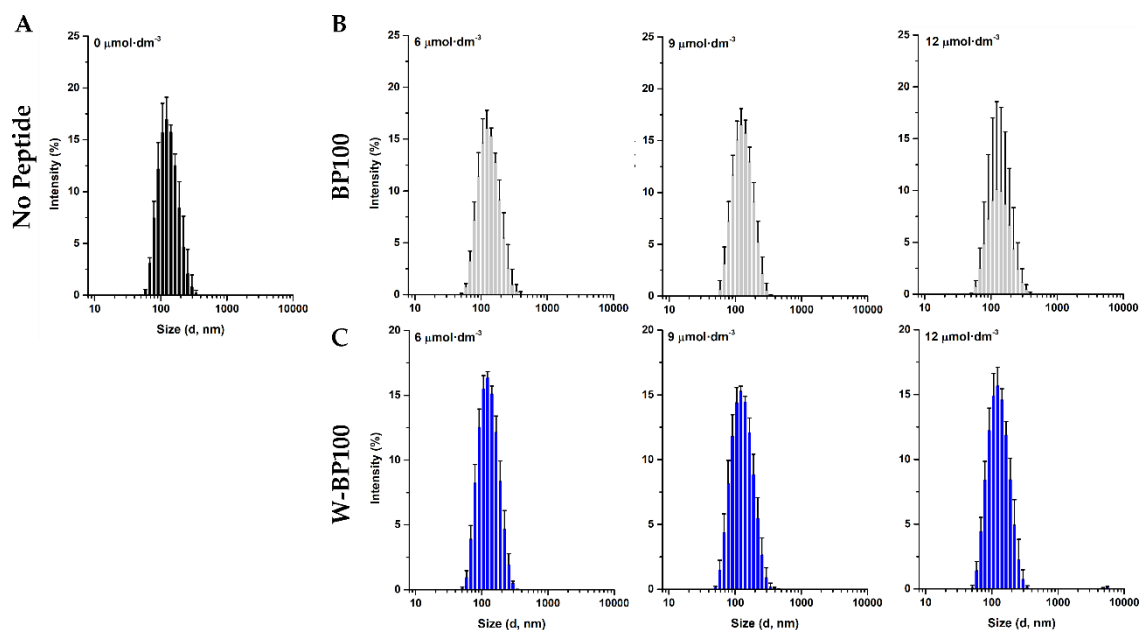

**Figure S10.** Intensity-weighted distribution of zwitterionic LUV in the presence of peptides. Intensity-weighted size distribution of  $100 \mu\text{mol dm}^{-3}$  POPC LUV in (A) absence and (B) presence of  $0\text{--}12 \mu\text{mol dm}^{-3}$  BP100 and (C) W-BP100.  $d$  stands for vesicle diameter. Data are the mean  $\pm$  SD of three independent experiments.

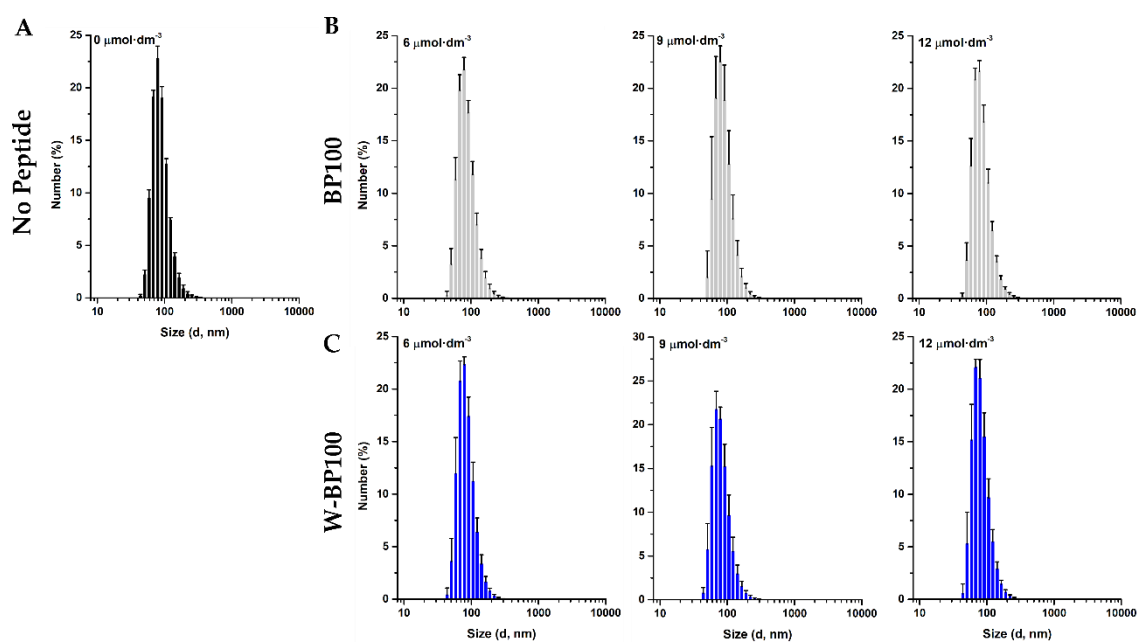

**Figure S11.** Number-weighted distribution of zwitterionic LUV in the presence of peptides. Number-weighted size distribution of  $100 \mu\text{mol dm}^{-3}$  POPC LUV in (A) absence and (B) presence of  $0\text{--}12 \mu\text{mol dm}^{-3}$  BP100 and (C) W-BP100.  $d$  stands for vesicle diameter. Data are the mean  $\pm$  SD of three independent experiments.

## Reference

1. HELIQUEST. Available online: <https://heliquet.ipmc.cnrs.fr> (accessed on January 25, 2020).
